## **The effect of common inversion polymorphisms *In(2L)t* and *In(3R)Mo* on patterns of transcriptional variation in *Drosophila melanogaster***

Erik Lavington<sup>1</sup>, Andrew D. Kern<sup>1,2</sup>

1. Department of Genetics, Rutgers University, Piscataway, New Jersey

2. Human Genetics Institute of New Jersey, Rutgers University, Piscataway, New Jersey

## 1 **Abstract**

2 Chromosomal inversions are an ubiquitous feature of genetic variation. Theoretical models describe several  
3 mechanisms by which inversions can drive adaptation and be maintained as polymorphisms. While inversions have  
4 been shown previously to be under selection, or contain genetic variation under selection, the specific phenotypic  
5 consequences of inversions leading to their maintenance remain unclear. Here we use genomic sequence and  
6 expression data from the *Drosophila* Genetic Reference Panel to explore the effects of two cosmopolitan  
7 inversions, *In(2L)t* and *In(3R)Mo*, on patterns of transcriptional variation. We demonstrate that each inversion has  
8 a significant effect on transcript abundance for hundreds of genes across the genome. Inversion affected loci (IAL)  
9 appear both within inversions as well as on unlinked chromosomes. Importantly, IAL do not appear to be  
10 influenced by the previously reported genome-wide expression correlation structure. We found that five genes  
11 involved with sterol uptake, four of which are Niemann-Pick Type 2 orthologs, are upregulated in flies with  
12 *In(3R)Mo* but do not have SNPs in LD with the inversion. We speculate that this upregulation is driven by genetic  
13 variation in *mod(mdg4)* that is in LD with *In(3R)Mo*. We find that there is little evidence for regional or position  
14 effect of inversions on gene expression at the chromosomal level but do find evidence for the distal breakpoint of  
15 *In(3R)Mo* interrupting one gene and possibly disassociating the two flanking genes from regulatory elements.

## 16 **Introduction**

17 Chromosomal inversions, in which a portion of linear DNA sequence is flipped in its orientation, are a common  
18 member of the menagerie of DNA polymorphisms, and have been found in diverse organismal populations such as  
19 humans, plants, and fruit flies (KRIMBAS and POWELL 1992; KIDD *et al.* 2010; LOWRY and WILLIS 2010). In many cases,  
20 large chromosomal inversions have profound impacts on phenotype and disease (FEUK 2010). For instance  
21 recurrent inversions are responsible for an estimated 43% of hemophilia A cases (LAKICH *et al.* 1993). Inversions can  
22 also have beneficial effects. A 900kb inversion on human chromosome 17 (q21.31) has been shown to be  
23 associated with higher female fecundity in the Icelandic population (STEFANSSON *et al.* 2005). In populations of the  
24 malaria vector *An. gambiae* a large chromosomal inversion on chromosome 2L (2La) is associated with desiccation  
25 resistance and thus segregates at high frequencies in arid environments (FOUET *et al.* 2012). These examples are

26 the very tip of the iceberg—inversion polymorphisms have been implicated in numerous phenotypic differences  
27 among a host of organisms, however little is known about the mechanisms by which inversions confer their  
28 phenotypic effects.

29 Perhaps the single best studied inversions are those from *Drosophila*, in part made famous by the pioneering work  
30 of Dobzhansky (DOBZHANSKY and STURTEVANT 1938). Dobzhansky focused much attention on spatial and temporal  
31 variation in frequency of large inversions of *D. pseudoobscura* and showed in broad strokes that clear fitness  
32 differences were responsible for the regular patterns of frequency change observed. These findings in turn spurred  
33 a large body of population genetics theory to explain the establishment and selective persistence of inversions in  
34 natural populations (LEVENE and DOBZHANSKY 1958; FRASER *et al.* 1966; ANDERSON *et al.* 1967; TOBARI and KOJIMA 1967).  
35 As postulated by Sturtevant (1921), crossover suppression induced in inversion heterozygotes can mean that a  
36 single adaptive allele within an inversion may suffice for the selective invasion of that rearrangement (Haldane  
37 1937). Such lowered levels of recombination and attendant increases in linkage disequilibrium (LD) could thus  
38 present the opportunity for subsequent coadaptation of multiple genes near inversion breakpoints (STURTEVANT  
39 and MATHER 1938; DOBZHANSKY 1947). Conversely locally adapted alleles that predate the rearrangement on the  
40 same chromosome might aid the establishment of an inversion simply because of the reduction in recombination  
41 rates between such loci (KIRKPATRICK and BARTON 2006). Further, inversions might have direct fitness effects, for  
42 instance by deletion or changes in gene expression near the inversion breakpoints (KIRKPATRICK and KERN 2012). At  
43 present we have precious little information as to the variants responsible for differential fitness effects associated  
44 with inversions.

45 In *Drosophila melanogaster* paracentric inversions spanning several megabases are common and have been found  
46 in populations across the globe (Stalker 1976, 1980; Knibb *et al.* 1981; Sezgin *et al.* 2004; Anderson *et al.* 2005;  
47 Umina *et al.* 2005). Much of this segregating inversion polymorphism is associated with latitudinal clines in  
48 *D. melanogaster*, an historically tropical species adapting along tropical-to-temperate climatic gradients in Australia  
49 and North America (KNIBB *et al.* 1981; WEEKS *et al.* 2002; DE JONG and BOCHDANOVITS 2003; SEZGIN *et al.* 2004;  
50 REINHARDT *et al.* 2014; SCHRIDER *et al.* 2016). Clinally varying phenotypes that are associated with inversions include  
51 heat resistance, cold tolerance, and body size (Weeks *et al.* 2002; Anderson *et al.* 2003; de Jong and Bochdanovits

52 2003). Clinal variation of inversion frequency in *D.melanogaster* has been shown via population genetic  
53 approaches to be due to selection independent of demography (Reinhardt *et al.* 2014; Kapun *et al.* 2016), though  
54 migration has been suggested to generate these patterns along with local adaptation (BERGLAND *et al.* 2016).  
55 Indeed, inversions have been observed to have a major effect on several phenotypes that vary between temperate  
56 and tropical populations across several *Drosophila* species and these clines have been stable since their discovery  
57 roughly 80 years ago (HOFFMANN *et al.* 2004; COGNI *et al.* 2017). Unfortunately, while the associations are known,  
58 the molecular mechanisms at work determining differential phenotypes as a result of inversion status are still  
59 unknown.

60 Recent population genomic projects in *D.melanogaster*, such as the Drosophila Genetic Reference Panel (DGRP)  
61 and Drosophila Population Genomics Project (DPGP), have opened the opportunity to study inversions  
62 systematically as these resources have captured segregating inversions from North America and Africa (POOL *et al.*  
63 2012; MACKAY *et al.* 2012; LANGLEY *et al.* 2012; HOULE and MÁRQUEZ 2015). Corbett-Detig *et al.* (2012)  
64 bioinformatically mapped previously unknown breakpoints of several inversions, a task that was tedious for even  
65 single inversions prior to whole genome sequencing (WESLEY and EANES 1994; ANDOLFATTO *et al.* 1999; MATZKIN *et al.*  
66 2005). For instance Corbett-Detig *et al.* (2012) discovered the breakpoints associated with numerous inversions  
67 and demonstrated the expected increase in LD near inversion breakpoints and elevated differentiation between  
68 inverted and standard arrangement chromosomes at the nucleotide level. In parallel with the exponential increase  
69 in population genomic resources, large-scale phenotypic association studies of these same genotypes have been  
70 accumulating (MACKAY *et al.* 2012; VONESCH *et al.* 2016; TELONIS-SCOTT *et al.* 2016). These include numerous  
71 phenotypes previously associated with inversion polymorphism such as body size (WEEKS *et al.* 2002) and  
72 desiccation resistance (HOFFMANN *et al.* 2005).

73 A logical place to look for inversion effects that may influence suites of phenotypes would be transcript level  
74 variation. Previous findings strongly suggest that inversions could be important drivers of adaptation with gene  
75 expression variation as a potential molecular mechanism (CHAMBERS 1991; LÓPEZ-MAURY *et al.* 2008; FRASER 2013).  
76 Indeed inversions could affect patterns of transcript variation in a number of ways: **1)** genes at or near inversion  
77 breakpoints may become disabled or separated from their regulatory apparatus, thus inversions may have direct

78 effects on transcription, **2**) increased LD in inversions due to crossover suppression may increase linkage with gene  
79 expression Quantitative Trait Loci (eQTL), and thus alternative alleles of the inversion may be associated with  
80 differential expression of genes within the inversion (i.e. indirect, cis-eQTL associated with the inversion), **3**) eQTL  
81 in LD with the inversion might themselves regulate genes outside of the inversion (i.e. indirect, trans-eQTL  
82 associated with the inversion), or **4**) the large-scale nature of *Drosophila* inversions may create global changes in  
83 the organization of chromatin or nuclear localization of the chromosomes such that genes are differentially  
84 regulated between inversion and standard karyotypes. Thus inversions may have a direct effect on global patterns  
85 of transcription, and act as trans eQTL themselves. Indeed earlier studies of transcriptional variation in  
86 *D.melanogaster* have hinted at the influence of inversions on genome wide patterns of gene expression (AYROLES *et*  
87 *al.* 2009; MASSOURAS *et al.* 2012; HUANG *et al.* 2015). Here we address the effect of two cosmopolitan inversions,  
88 *In(2L)t* and *In(3R)Mo*, on patterns of transcription by using whole-genome sequence, gene expression, and  
89 inversion call data from the DGRP.

## 90 **Methods/Materials**

91 **Materials:** Processed expression data previously reported in (Ayroles *et al.* 2009) was downloaded from  
92 ArrayExpress (KOLESNIKOV *et al.* 2015). We accepted inversion state calls for each of the DGRP lines where  
93 cytological and bioinformatic inversion calls for *In(2L)t* and *In(3R)Mo* agree and removed lines from analyses where  
94 there was any disagreement (CORBETT-DETIG *et al.* 2012a; HUANG *et al.* 2014; HOULE and MÁRQUEZ 2015). Using the  
95 same databases, we removed Individuals from lines likely heterozygous for *In(2L)t* or *In(3R)Mo*. Expression  
96 analyses were performed with 34 lines (136 individuals), with two lines homozygous for *In(2L)t* and seven lines  
97 homozygous for *In(3R)Mo*. There were 26 lines homozygous for the Standard arrangement at both *In(2L)t* and  
98 *In(3R)Mo*, as one line was homozygous for both inversions. We calculated LD between *In(2L)t* and SNPs using 181  
99 lines including 19 inversion bearing lines. We calculated LD between *In(3R)Mo* and SNPs using 197 lines including  
100 17 inversion bearing lines. To maintain consistency with Affymetrix library files, dm3/BDGP release 5 genomic  
101 coordinates and annotations corresponding to BDGP version 5.49 were used in conjunction with the Affymetrix  
102 *Drosophila* 2 Release 35 library file update.

103 **Methods:**

104 Statistical analyses were performed in R (R CORE TEAM 2013) using the functions (lm), (anova), (quantile),  
105 (qvalue), (phyper), and (ggplot2).

106 **3' UTR Array Analysis:**

107 *Correlation structure:* Pairwise gene expression correlation coefficients were calculated by linear regression on all  
108 unique pairwise combinations of probe sets, excepting self-comparisons. Correlation coefficients reported here as  
109 adjusted  $r^2$  from the R function (lm). Gene expression modules used here were reported in Ayroles et al (2009).  
110 Null distributions of uniquely occupied clusters for each inversion were generated by permuting the occupied  
111 cluster for each gene 100,000 times and calculating the total unique clusters occupied by inversion affected loci  
112 (IAL) for each permutation.

113 *Inversion effect on expression:* Linear regressions of sex, inversion, and Line effects with expression as the response  
114 were performed for each probe set:

115 
$$Y_{ijkl} = \mu + A_i + B_j + C_k + D_{kl} + \epsilon_{ijkl}$$

116 for individual expression value,  $Y_{ijkl}$ , in response to  $i^{\text{th}}$  Sex,  $A_i$ ,  $j^{\text{th}}$  *In(2L)t* state,  $B_j$ ,  $k^{\text{th}}$  *In(3R)Mo* state,  $C_k$ , and the  $l^{\text{th}}$   
117 Line in the  $j^{\text{th}}$  *In(2L)t* state,  $D_{kl}$ , with  $\epsilon_{ijkl}$  as the error term in Lines. Model testing was performed using (add1) and  
118 (drop1) in R to add interaction terms or remove main effect terms from the above model, respectively.  
119 Interaction terms were added one at a time to the main effects and tested for each probe set. An AIC is reported  
120 for each model with a lower absolute value being preferred when comparing two models. The effect of adding an  
121 interaction term between Sex and *In(2L)t* or Sex and *In(3R)Mo* varied by probe set, but the above model was the  
122 best fit for 10,082 of the probe sets. Models with and without an interaction term between inversions performed  
123 the same for all loci thus we chose the less complex model. Similarly, the above model was the best fit for 12,994  
124 probe sets when compared to dropping any of the main effect terms. We calculated  $p$ -values of the observed  $F$   
125 values as percentiles of the  $F$  distributions generated by 10,000 permutations sampling each inversion  
126 independently without replacement. Multiple testing correction was performed by calculating  $q$ -values using the R

127 package (`qvalue`) with FDR=0.05 (STOREY and TIBSHIRANI 2003) on the permutation-derived  $p$ -values. Proportion  
128 of variance explained by each effect was calculated as  $\eta^2$ . Magnitude and direction of inversion effect was  
129 calculated as Cohen's  $d$  (COHEN 1988). Cohen's  $d$  is a description of the difference between two standardized  
130 distributions and the expected proportion of overlap between the distributions can be estimated given a false  
131 positive rate. For example, for two distributions, each with a standard deviation of 1, a Cohen's  $d$  of 1 represents a  
132 difference of 1 standard deviation between the means and a ~62% expected overlap given a false positive rate of  
133 5%.

134 **Functional Annotation Enrichment:** Functional annotation profiling was performed using the `g:Profiler` online  
135 portal of `g:GOST` using default settings (REIMAND *et al.* 2016) (version `r1622_e84_eg31`). Ambiguous 3'UTR probe  
136 sets were resolved manually if possible, or ignored if they overlapped transcripts for more than one gene.

137 **SNP-Inversion LD:** Linkage disequilibrium (LD) was calculated as  $r^2 = D' / p_s(1-p_s)p_i(1-p_i)$  for each diallelic SNP  $S$  and  
138 inversion  $I$ , with major allele frequencies  $p_s$  and  $p_i$ , using a custom bash script. For each SNP, significance was  
139 calculated as a chi-squared ( $\chi^2$ ) transformation with 1 degree of freedom of  $r^2$  as  $\chi^2 = Nr^2$ , where  $N$  is the sample  
140 size. Significant LD was defined as a SNP with sample size of at least 60, minor allele frequency of 10% for both the  
141 SNP and inversion state, and  $\chi^2 >$  critical value ( $p=0.05$ ,  $d.f.=1$ ) with Bonferroni correction for all SNPs on that  
142 chromosome arm ( $n=967774$ ,  $\chi^2 > 29.65329$  and  $947970$ ,  $\chi^2 > 29.61321$  for `chr2L` and `chr3R`, respectively). The  
143 sample size and minor allele frequency cutoffs ensured that there were at least six representative lines bearing  
144 minor alleles. Genes were considered in significant LD with inversion state if at least one significant SNP was found  
145 within the annotated gene region (FlyBase v5.49).

146 **IAL physical clustering:** To see if inversion affected loci (IAL) were physically clustered within the genome, we  
147 examined physical clustering by measuring the coefficient of variance (CV) of distances between genes by  
148 chromosome arm. Location and length of each gene was used from FlyBase v5.49. Distance between neighboring  
149 genes was calculated as the distance between ends of gene annotated regions of neighboring genes. Distance from  
150 the most distal or proximal genes to the distal or proximal endpoint, respectively, was not included. CV was  
151 calculated as the standard deviation divided by the mean of the distribution of intergenic distances for each

152 chromosomal arm (SOKAL and ROHLF 1995). We defined the intergenic distance between overlapping gene regions  
153 as zero. Null distributions of intergenic distances for each chromosome and each inversion were generated by  
154 100,000 random samples, without replacement, of the same number of genes from a chromosome arm as the  
155 number of IAL for that chromosome arm and inversion, then calculating the distances between those genes.  
156 Confidence intervals were calculated as 2.5%-97.5% quantiles from the corresponding random sample distribution.

157 **Transcription factor-target gene interactions:** Transcription factors (TFs) and target genes (TGs) were defined by  
158 Drosophila Interaction Database modMine (CONTRINO *et al.* 2012) (v2015\_12). Genes in this analysis were those  
159 that are present in Affymetrix Drosophila2 genome array annotation (Release 35), DroID TF-TG database  
160 v2015\_12, and FlyBase v5.49 annotation. Over/under-representation of genes with significant inversion effect on  
161 expression as targets of transcription factors with SNPs in LD with inversion state was calculated as the probability  
162 of the observation given the hypergeometric distribution.

163 Custom scripts, data, and analysis results can be found online at <https://github.com/kern-lab/lavingtonKern> ,  
164 including file descriptions in the AnalysisFiles.readme document.

## 165 **Results**

166 To examine what influence, if any, common inversion polymorphisms have on patterns of transcription in the  
167 Drosophila genome we combined publically available genome sequences(MACKAY *et al.* 2012), their associated  
168 karyotype calls (CORBETT-DETIG *et al.* 2012a; HUANG *et al.* 2014; HOULE and MÁRQUEZ 2015), and previously published  
169 microarray based expression data(AYROLES *et al.* 2009). We validated the use of a model with only main effects of  
170 Sex, Line, and two cosmopolitan inversions, *In(2L)t* and *In(3R)Mo* using the R functions (add1) and (drop1). This  
171 main effects model performed better than any model having any of the main effect terms removed or with the  
172 addition of any interaction term (see Methods). After correction for multiple testing (see Methods), we found 229  
173 and 498 total probe sets with significant inversion effects for *In(2L)t* and *In(3R)Mo*, respectively, hereafter referred  
174 to as inversion affected loci (IAL) (Figure 1). These IAL occur both within the inversions themselves (40 *In(2L)t*, 111  
175 *In(3R)Mo*), outside the inversions but near the breakpoints (3 *In(2L)t*, 38 *In(3R)Mo* within 1Mb of the breakpoint),  
176 as well as scattered throughout the genome (134 *In(2L)t*, 181 *In(3R)Mo*; see Table 1). This is a large number of loci



177 with transcript abundance variation correlating with inversion state; however, we note that the inversion effect  
178 contribution to variance is relatively small for the vast majority of loci (Supplemental data).

179 One explanation for the large number of IAL found across the genome is that few loci are directly affected by the  
180 inversion and the remaining loci are affected indirectly by an expression variation correlation structure, previously  
181 described by Ayroles et al (2009). We addressed this correlation structure by the numbers of unique expression  
182 modules occupied by, and the distribution of correlation coefficients of, IAL as compared to all genes. If a  
183 significant portion of the IAL we observe are due to expression variation correlation, then we would expect that  
184 IAL occupy fewer expression modules than the same number of genes drawn at random. We would also expect the  
185 mean correlation of IAL between IAL to be higher than the genome wide average. We observe IAL occupy more  
186 modules than expected at random for both *In(2L)t* (71 obs; 38-56 95% c.i.) and *In(3R)Mo* (108 obs ; 65-87 95% c.i.).  
187 For both inversions, we did not observe higher mean correlation between IAL between IAL and non-IAL or the  
188 genome-wide mean (Table 2).

189 We then examined the inversion effect on gene expression variation for four distinct categories of effect: 1.) *cis*- or  
190 2.) *trans*-inversion effects of SNPs in LD with the inversion, 3.) direct effects of the inversion by interrupting genes,  
191 and 4.) regional effects of chromosomal rearrangement.

#### 192 ***Cis*-Inversion effect of SNPs in LD with the inversion**

193 Our model explicitly tests the effect of chromosomal arrangement on expression variation and here we focus on  
194 SNP variation as the main driver of the inversion effect by taking advantage of LD between the inversion state and  
195 SNP variants. LD with inversions is highest at the breakpoints and decays in both directions from each breakpoint  
196 as expected (Figure 2) (WESLEY and EANES 1994; ANDOLFATTO *et al.* 2001; LANGLEY *et al.* 2012; CORBETT-DETIG *et al.*  
197 2012b). To determine *cis*-effects of the inversions we tested for over-representation of IAL among loci in LD with  
198 inversion state. This ignores the location of the loci and focuses on the correlation of SNP alleles with the inversion  
199 state. As expected, few loci in LD with the inversion were located on a different chromosomal arm (3 with *In(2L)t*,  
200 and 2 with *In(3R)Mo*) and IAL in LD are located only on the same chromosomal arm (Table 3). We observed a  
201 significant overrepresentation of IAL with SNPs in LD with inversion state (Table 4).

202 ***Trans*-inversion effect of SNPs in LD with the inversion**

203 Our expectation of a *cis*-inversion effect is dependent on SNP variation in LD with the inversion. By the same  
204 rationale, a *trans*-inversion effect may be detected as an IAL without SNP variation in LD with the inversion, as we  
205 observe with a majority of IAL for each inversion (181 of 192 for *In(2L)t* and 323 of 425 for *In(3R)Mo* (see Table 4).  
206 Assuming SNP variation is the basis of expression variation, one trivial explanation of a *trans*-inversion effect is SNP  
207 variation in transcription factors in LD with the inversion acting on downstream targets. The TFs in this case need  
208 not be IAL as SNPs in protein coding regions of TFs can give rise to expression variation in downstream targets.  
209 However, we found no over- or underrepresentation of IAL that are targets of TFs with SNPs in LD with either  
210 inversion (Table 5). A possible example of *trans*-inversion effect was found by functional analysis of IAL and  
211 discussed below.

212 **Direct effect of inversions by disrupting genes at breakpoints**

213 Nucleotide sequence variation at each breakpoint of an inversion can truncate transcribed gene regions and  
214 disassociate transcribed regions from transcription factor binding sites and other regulatory elements. Truncation  
215 most likely leads to down-regulation of genes and rearrangement of regulatory elements and can lead to up- or  
216 downregulation of genes at either breakpoint. The closest IAL to any of the four breakpoints are near the distal  
217 breakpoint of *In(3R)Mo*. *CG1951* and *βGalNAcTB* are within 2.5kb inside and outside of the inversion region,  
218 respectively, and *Ss12* is interrupted by the breakpoint. All three are downregulated in the presence of the  
219 inversion. The next closest IAL is 24 kb away. The closest IAL to the proximal breakpoint of *In(3R)Mo* are 32kb  
220 away. It is also important to note that loci immediately surrounding the proximal breakpoint are not  
221 transcriptionally affected by the rearrangement, so the presumed disassociated regulatory elements from the  
222 distal end are not altering expression of loci at the proximal end. The closest IAL to the proximal and distal  
223 breakpoints of *In(2L)t* are 34kb and 37kb away, respectively, and thus probably too far to have been affected by  
224 direct effects of the breakpoint.

225 **Regional effect of chromosomal rearrangement**

226 We tested for regional effects of chromosomal rearrangement by looking for over- or underrepresentation of  
227 genes in LD with the inversion as IAL. We did observe more IAL than expected in LD with each inversion (Table 4)  
228 and a trend of transcriptional downregulation across the *In(2L)t* region (Figure 3 A & D), but note that the effect  
229 size is relatively small. Near the breakpoints, patterns of inversion effect direction are generally small and not likely  
230 significantly different from zero (Figure 3 B,C,E & F). The pattern of downregulation immediately surrounding the  
231 distal breakpoint of *In(3R)Mo* is moderate and appears to be driven by three loci: *CG1951*, *Ssl2*, and *64GalNAcTB*.  
232 This is likely a direct effect of the inversion on *Ssl2*, as the breakpoint interrupts this gene proximal to *CG1951*  
233 (CORBETT-DETIG *et al.* 2012a), and possibly disassociation of regulatory elements from coding sequence with respect  
234 to *CG1951* and *64GalNAcTB*.

235 We also examined whether IAL tend to cluster together by physical location along chromosomes, which could arise  
236 from more localized regional effects. We measured physical clustering as the coefficient of variation (CV) of  
237 distances between genes, for the global CV, and between IAL by chromosome arm. For each arm, IAL for both  
238 inversions were less clustered than the distribution of all genes, although *In(3R)Mo* IAL are more clustered on  
239 chromosome 3R than we would expect for the same number of randomly drawn genes, but are still less clustered  
240 than the genomic background generally (Table 6).

#### 241 **Functional analysis**

242 Coadapted alleles segregating with an inversion should also be in LD with the inversion breakpoints. We used  
243 gProfiler g:GOST functional profiling to detect overrepresentation of functional groups in sets of IAL. The sets of IAL  
244 that we analyzed were those IAL in LD with the inversion (Table 2) or targets of another gene with variation  
245 segregating with the inversion (Table 4). Functional analysis of IAL for each inversion yielded significant groups only  
246 when considering all *In(3R)Mo* IAL or only IAL where inversion state explains at least 15% of expression variance  
247 (Supplemental data). Sterol transport is significant in both cases ( $p=0.022$  for all,  $p=0.000116$  for  $\geq 15\%$  variance)  
248 and catalytic activity term (GO:0003824) is significant when considering all IAL ( $p=0.000146$ ). We found no  
249 significant functional groups when considering any similar grouping of *In(2L)t* IAL.

250 The sterol transport group found to be enriched among *In(3R)Mo* IAL includes four of the eight Niemann-Pick type  
251 2 orthologs (*Npc2b*, *Npc2c*, *Npc2f*, *Npc2g*) (HUANG *et al.* 2007), along with *Apoltp*. All five genes are upregulated in  
252 association with the inverted arrangement, suggesting an increase of sterol uptake in *In(3R)Mo* bearing flies. In the  
253 context of the expression samples, most of these genes are preferentially expressed in the adult gut (modENCODE,  
254 Contrino *et al.* 2012). While the four NPC2s are on chromosome 3R (Figure 4), *Apoltp* is on chromosome 2L, and  
255 none of these genes contain a SNP in the gene region that is in significant LD with *In(3R)Mo*, or each other, and  
256 only *Npc2f* is within the inversion region (Figure 5). It is possible that the significant upregulation of the sterol  
257 transport group is a downstream effect of *mod(mdg4)*, which is an IAL near the proximal breakpoint (Figure 4) and  
258 in LD with *In(3R)Mo* (Figure 5). *mod(mdg4)* is a chromatin protein associated with *Npc2b* as well as other  
259 chromatin proteins and TFs associated with all eight *Npc2* orthologs (Supplemental data). We address this exciting  
260 finding in further detail in the Discussion.

## 261 Discussion

262 Despite decades of research on polymorphic inversions in *Drosophila melanogaster*, and despite an overwhelming  
263 consensus that inversions are maintained due to selection, we have little understanding of the targets of selection  
264 in these inversions that leads to their maintenance (cf. Kirkpatrick and Kern 2012). Here we examine the role of  
265 transcriptional variation induced by cosmopolitan inversions to explore what effect, if any, inversions might have  
266 on gene expression that itself might be selectively favored. Besides gross rearrangement effects, we examined  
267 gene disruption at inversion breakpoints, IAL in LD with the inversion, and IAL not in LD with the inversion. We  
268 assumed that multiple functionally linked IAL to be potentially coadapted so long as they contained SNPs in LD  
269 with the inverted arrangement. We also assumed that *trans*-inversion effects, IAL not in LD with the inversion,  
270 could be the result of these loci interacting with TFs in LD with the inversion or epistatic interactions with loci in  
271 LD. We note that while sample size of *In(2L)t* bearing individuals in the expression analysis is small (8 of 136), we  
272 were still able to detect a relatively large number of significant loci across the genome. We believe that our  
273 methods were conservative and limit the number of false positives at the expense of a likely high number of false  
274 negatives. We argue that we are accounting for the small sample sizes in our analyses and interpretations. We also

275 note that we could not address over- or under-dominance in this study as we examined only lines known to be  
276 homozygous for either arrangement of *In(2L)t* or *In(3R)Mo*.

277 Of particular concern was what role, if any, expression correlation had on our findings. To explore this we  
278 considered pairwise correlation coefficients and previously described expression modules (AYROLES *et al.* 2009).  
279 One could imagine that the true false discovery rate would be much higher than anticipated due to expression  
280 correlation of multiple loci from the same expression module. We found that IAL for both inversions occupied  
281 more expression modules than we would expect when drawing genes at random. Even when considering just the  
282 pairwise expression correlation, we found that IAL for both inversions were slightly less correlated on average than  
283 the genome wide mean. These observations suggest that the inversion effects arose independent of the underlying  
284 correlation structure.

285 We found many loci of significant effect, yet most have a modest contribution to expression variation. Importantly,  
286 the only evidence of direct structural influence on patterns of expression was at a single breakpoint that appears  
287 to be due to the inversion mutation interrupting gene regions but not moving genes to a different region of the  
288 chromosome. That is, there was no appreciable pattern of up- or down-regulation of genes along the chromosome  
289 with respect to the location of inversion breakpoints. Perhaps unsurprisingly, we did find an overabundance of  
290 expression perturbation within the inversion regions themselves. This would suggest the effect is possibly due to  
291 genetic, rather than the structural, variation in LD with the inversion. That is, transcription variation associated  
292 with the inversion is due to genetic variation at the gene level and not the rearrangement of loci.

293 Inversion polymorphism can be maintained by reduced recombination between locally coadapted alleles within  
294 inversions (DOBZHANSKY and OTHERS 1970), both with (NEI *et al.* 1967; PEPPER 2003) or without epistasis (KIRKPATRICK  
295 and BARTON 2006). Clinal inversion variation in *D.melanogaster* within *In(3R)Payne* in Australian populations and  
296 *In(3R)Payne*, *In(2R)NS*, and *In(2L)t* in American populations has been shown to be due to selection rather than  
297 demographic history and indicative of coadaptation (KENNINGTON *et al.* 2006; KOLACZKOWSKI *et al.* 2011; KAPUN *et al.*  
298 2016). We reasoned that one might be able to detect epistatic coadaptation through functional analysis of IAL.  
299 Coadaptation of non-interacting loci would likely result in either no significant functional groups or multiple,

300 unrelated significant groups. We found functional annotation enrichment only when we considered all IALs with  
301 respect to *In(3R)Mo*. This would suggest that either one locus or a few coadapted, but non-interacting, loci  
302 segregate with these inversions to maintain polymorphic inversions. However, it is still possible that coadapted loci  
303 could be overlooked in our analysis; certainly the existing annotation is incomplete. Moreover, our statistical  
304 power to detect IAL suffers due to the constraints of the number of inversions captured in the DGRP dataset.  
305 Nevertheless our observation that there are multiple IAL within the inversion with argues strongly for the role that  
306 inversions play as modifiers of recombination which may hold adaptive haplotypes together.

307 Our strongest functional finding, that sterol uptake associated with *In(3R)Mo*, appears to be driven by genetic  
308 variation in a single locus as a *trans*-inversion effect. Four of the five genes in this cluster are located on  
309 chromosome 3R, however none of these genes have a SNP in significant LD with *In(3R)Mo*, or with each other  
310 (Supplemental data), and only one is found within the inversion region (*Npc2f*). This would rule out effective  
311 coadaptation of these genes and suggest that the location of these genes on the same chromosome as the  
312 inversion is coincidence. Assuming the upstream effector of the sterol transport is a transcription factor, it could  
313 contain a SNP that alters either its protein-coding sequence or expression. Either scenario would require that the  
314 genetic variant responsible for the upregulation of the four *Npc2s* in question would have to be in LD with  
315 *In(3R)Mo*. Only one TF, *mod(mdg4)*, annotated in DroiDb as interacting with any (*Npc2b*) of the five sterol  
316 transport IAL contains a SNP in LD with *In(3R)Mo*. Furthermore, *mod(mdg4)* is itself an IAL and also located near  
317 the proximal breakpoint of *In(3R)Mo*. We speculate that inversion associated expression variation detected in this  
318 functional group is under control of *mod(mdg4)*.

319 Increased sterol uptake fits nicely with the positive correlation of *In(3R)Mo* frequency with latitude (KAPUN *et al.*  
320 2014). *Npc2* genes control sterol homeostasis via uptake of dietary sterols in *D.melanogaster*(HUANG *et al.* 2007;  
321 CARVALHO *et al.* 2010; NIWA *et al.* 2011). Two species of *Drosophila* differentially express *Npc2's* in response to cold  
322 acclimation, though the patterns differ between the two (PARKER *et al.* 2015). Increased dietary cholesterol  
323 increases cold tolerance in *Drosophila melanogaster* (SHREVE *et al.* 2007), however, *D.melanogaster* takes up  
324 phytosterols more efficiently than cholesterol (COOKE and SANG 1970). Furthermore, *D.melanogaster* is a sterol  
325 auxotroph (CARVALHO *et al.* 2010; NIWA *et al.* 2011) that utilizes dietary sterols preferentially to biosynthesizing

326 different sterols from dietary sterols (CARVALHO *et al.* 2012). This would suggest that *In(3R)Mo* carrying  
327 *D.melanogaster* could be cold-acclimated due to increased uptake of dietary sterols, rather than the upregulation  
328 of cholesterol production.

329 It is difficult to interpret results for *In(2L)t* without a clear functional annotation group associated with the inverted  
330 state. Assuming *In(2L)t* is under selection (KAPUN *et al.* 2016), the simplest interpretation is that *In(2L)t*  
331 polymorphism is maintained by only a small number of loci in LD with the inversion. It is possible that one or more  
332 loci in LD with *In(2L)t* contain protein coding variation under selection and no appreciable transcript abundance  
333 variation with respect to chromosomal arrangement. We note that there are only 14 IAL in LD with *In(2L)t*  
334 (Supplemental data). While a lack of a significant functional group may be dissatisfying, this does provide a  
335 manageable candidate list for validation of single targets.

### 336 **Conclusion**

337 We found that two different cosmopolitan inversions in *D.melanogaster* have some effect on the expression of  
338 hundreds of genes across the genome. While we caution that our sample sizes, particularly for *In(2L)t*, are very  
339 small, the permutation approach that we have taken is conservative. The genetic variation responsible for the  
340 observed transcriptional variation is only in small part due to the inversion event itself, with the majority of the  
341 variation being the result of either allelic variation in LD with the inversions, trans-effects of regulators that also  
342 are in LD with the inversions, or as of yet uncharacterized, indirect effects of the inversions. Our results mirror  
343 those of a recent report on transcriptional variation caused by inversions in *Drosophila pseudoobscura* (FULLER *et al.*  
344 2016). Fuller *et al.* demonstrated quite convincingly that the well-studied polymorphic inversions of *D.*  
345 *pseudoobscura* are modulating levels of transcription at multiple life history stages and even found hints of trans-  
346 effects. However, due to experimental design constraints they could not examine inversion effects on unlinked  
347 chromosomes. Our findings extend this pattern to *Drosophila melanogaster* and show that inversions are affecting  
348 loci genome-wide. While we have begun to parse the possible causes of IAL, our focus on available data limits the  
349 statistical power of our study. Thus it will be important to conduct carefully designed experiments on inversion

350 polymorphism in *D.melanogaster* to elucidate the true extent of influence of inversions on genome-wide patterns  
351 of transcription.

352 **Acknowledgements**

353 We thank Dan Schrider and Steve Schaeffer and two anonymous reviewers for feedback on the manuscript. A.D.K.  
354 and E.L. were supported in part by NIH award no. R01GM078204.

355



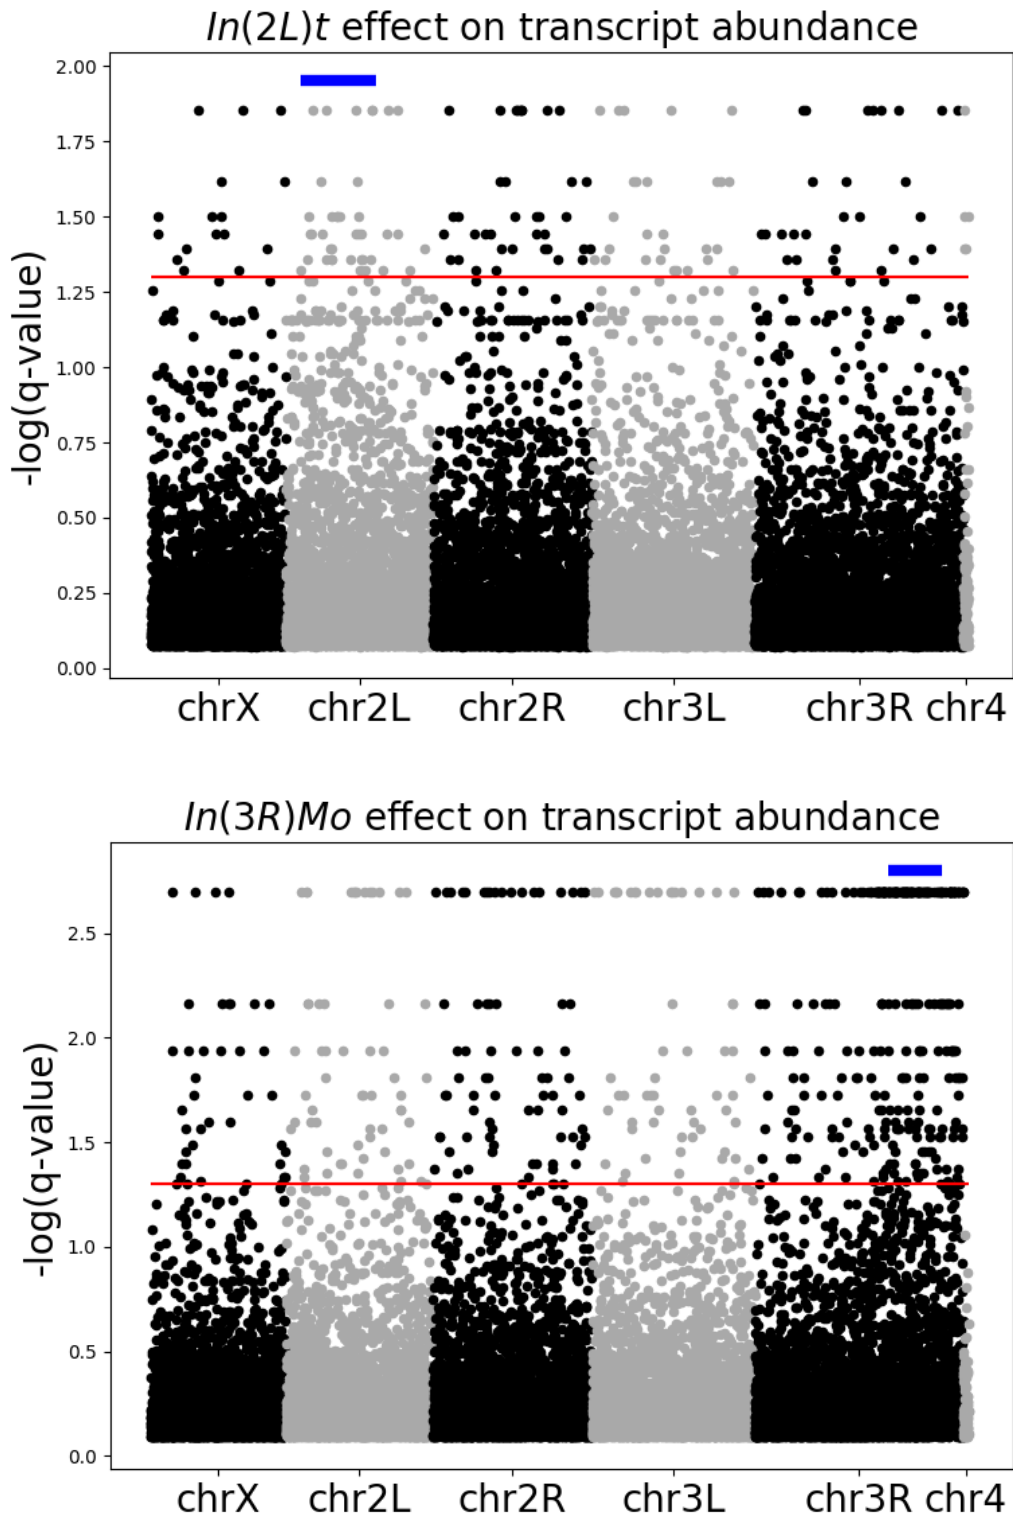

Figure 1. Manhattan plot of log transformed, Bonferroni corrected p-values for an *In(2L)t* (top) and *In(3R)Mo* (bottom) inversion effect on transcription for each probe set across the genome. The blue bar above the points indicates the genomic location of the inversion. The red horizontal line represents the genome-wide significance threshold of  $p=5 \times 10^{-8}$

359

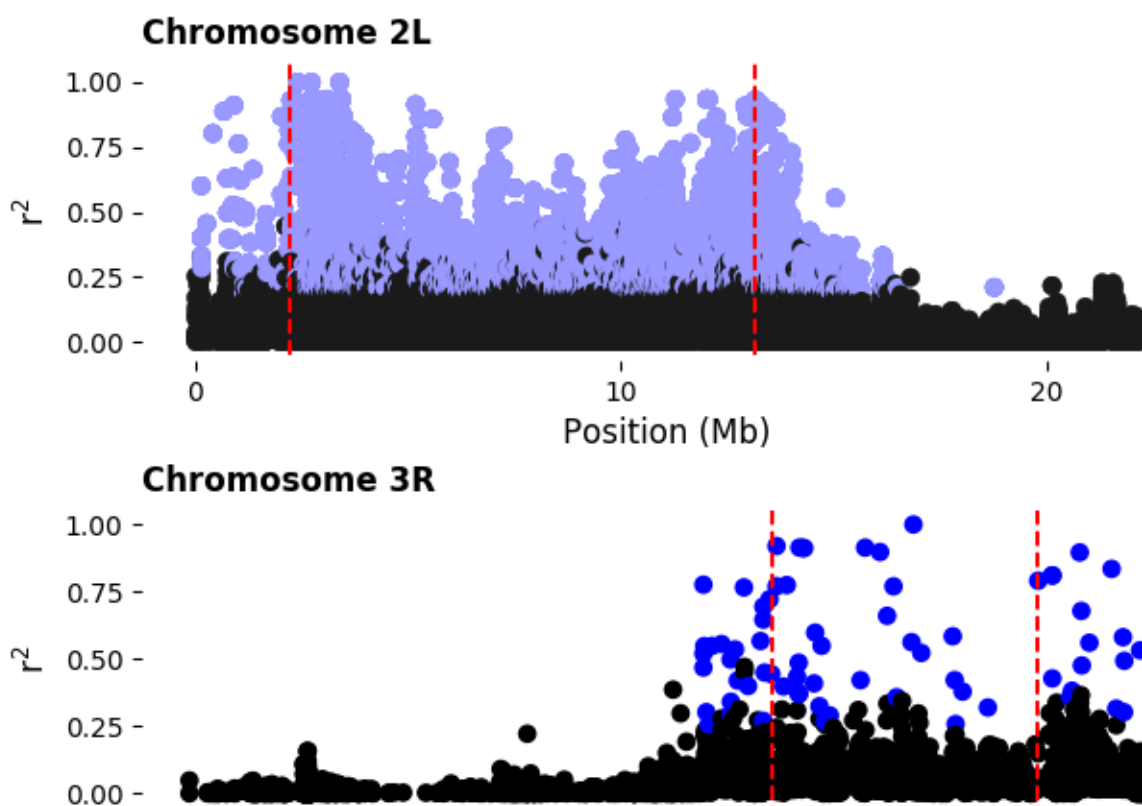

360 Figure 2. Linkage disequilibrium between SNPs and inversion state. Disequilibrium is measured as  $r^2$ .  
361 Inversion and SNP, and are in significant LD with the inversion are shown in light blue ( $p < 0.05$ , Bonferroni  
correction for all SNPs detected by chromosome arm).

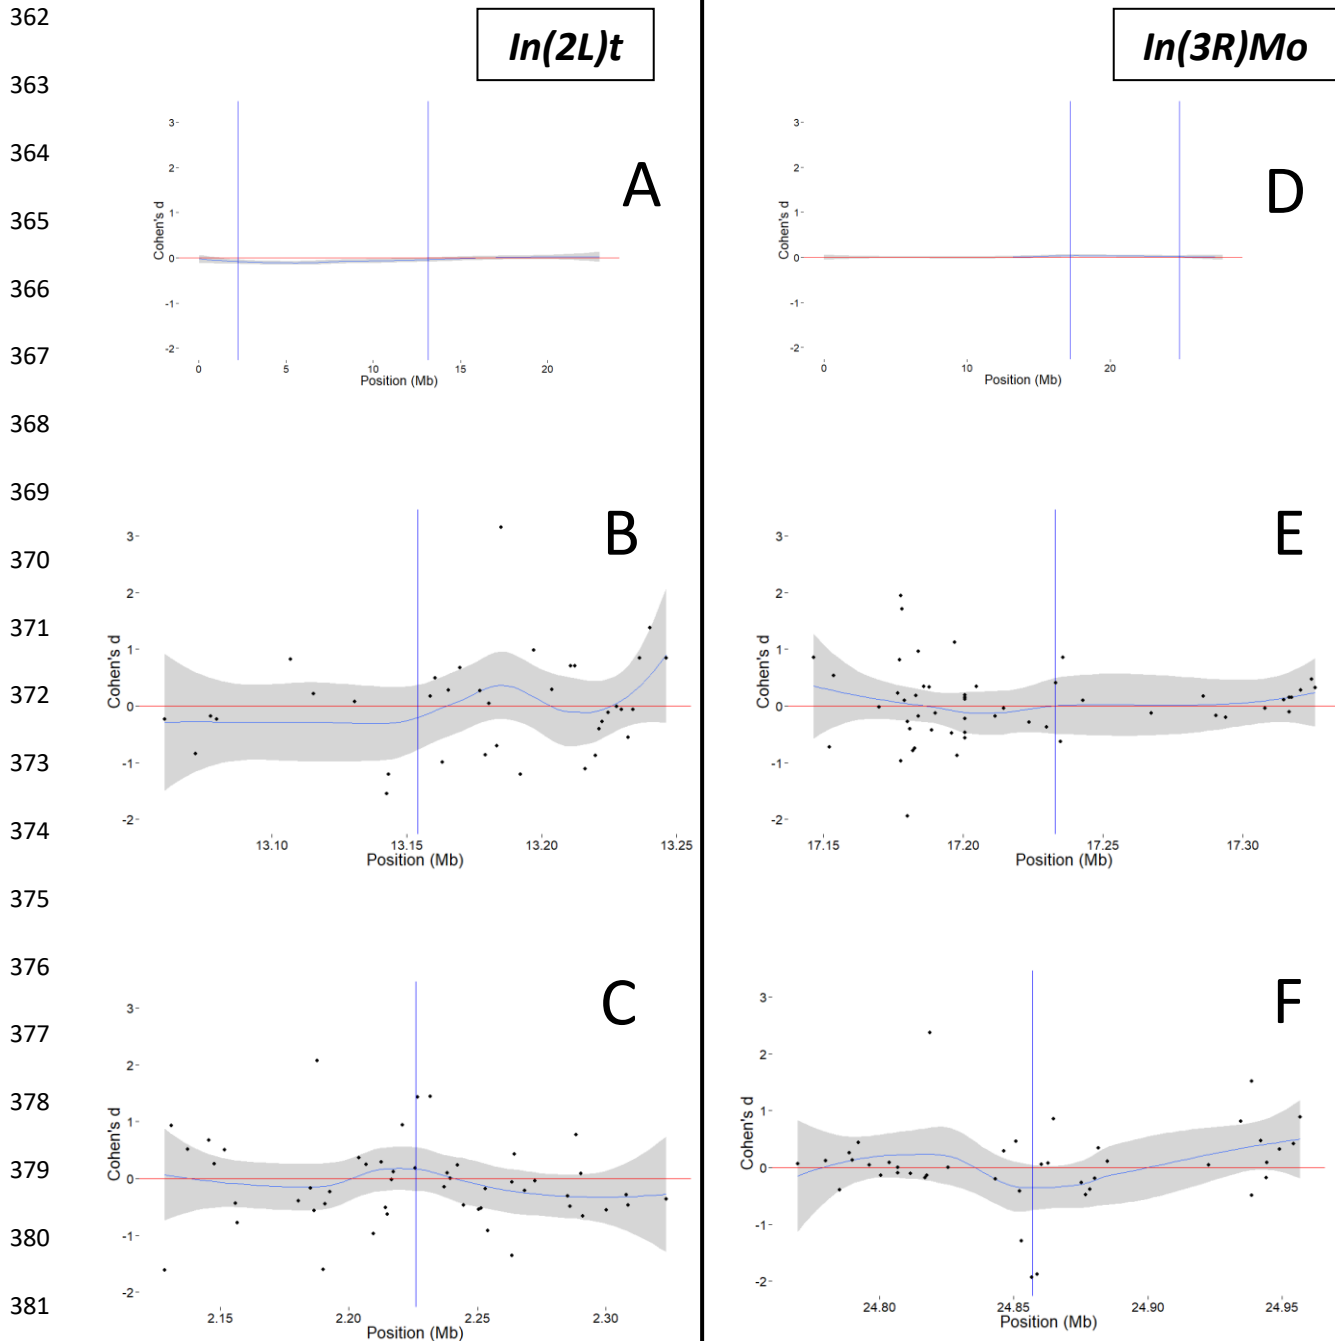

382 Figure 3. Cohen's d of inversion effect for probe sets by location. Cohen's d for *In(2L)t* effect across chromosome  
383 2L (A) and for *In(3R)Mo* effect across chromosome 3R (D). Loess curves (polynomial line) and 95% confidence  
384 intervals (shaded area) for 200kb surrounding each breakpoint: *In(2L)t* (B) proximal and (C) distal, *In(3R)Mo*  
385 proximal (E) and distal (F). Inversion breakpoints are depicted as vertical lines. Loess curves and confidence  
386 intervals generated by (`geom_smooth`) function in R package (`ggplot2`). Positive values of Cohen's d  
387 represent increased transcript levels associated with the inverted chromosome state and negative values  
388 represent decreased transcript levels.

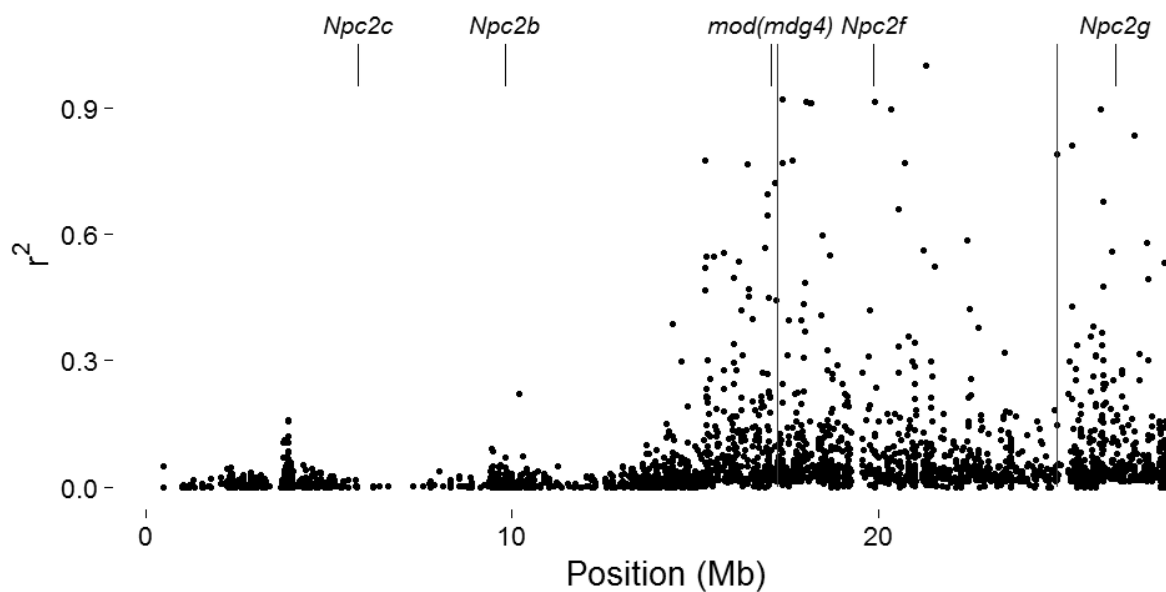

389

390 Figure 4. Location of *Npc2s* and *mod(mdg4)* on chromosome 3R. Long vertical lines represent breakpoints of  
391 *In(3R)Mo*. Only *mod(mdg4)* contains a SNP in LD with *In(3R)Mo*.

392

393

394

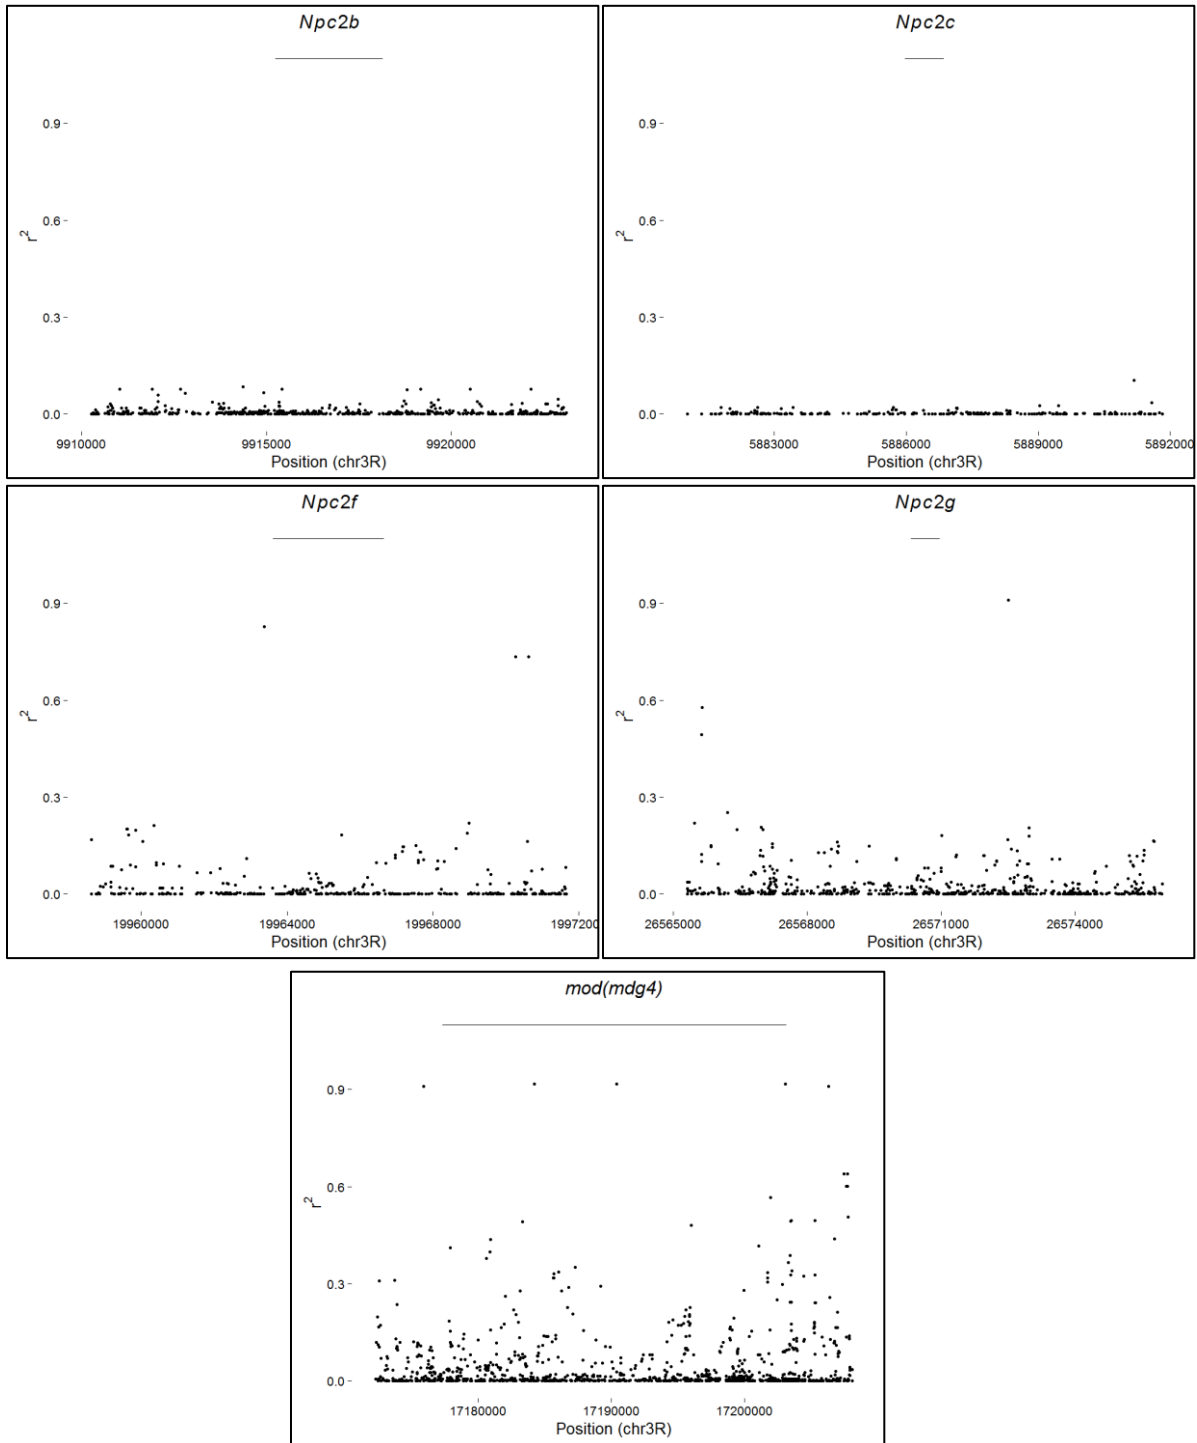

395

396

397 Figure 5. Correlation of SNPs with *In(3R)Mo* by gene. All SNPs within gene regions and within 5kb up- and down-  
398 stream of each gene: *Npc2b*, *Npc2c*, *Npc2f*, *Npc2g*, and *mod(mdg4)*. Thin horizontal bars above each plot represent  
399 the gene region for that gene.

400

|                        | Within Inversion | Outside Inversion, on same Chr | < 1Mb outside Inversion | Chr 2L | Chr 2R | Chr 3L | Chr 3R | Chr X | Chr 4 |
|------------------------|------------------|--------------------------------|-------------------------|--------|--------|--------|--------|-------|-------|
| <b><i>In(2L)t</i></b>  | 40               | 18                             | 3                       | 61     | 42     | 36     | 35     | 17    | 4     |
| <b><i>In(3R)Mo</i></b> | 111              | 133                            | 38                      | 44     | 58     | 49     | 244    | 30    | 0     |

401

402 Table 1. Location of IAL. Counts of IAL between breakpoints, on the same chromosome as the inversion but outside  
403 of the breakpoints, and those on the same chromosome as the inversion but outside, and within 1Mb, of the  
404 breakpoints, as well as total IAL on each chromosome arm for each inversion.

|                        |                    | Mean $r^2$ |
|------------------------|--------------------|------------|
| <b><i>In(2L)t</i></b>  | <b>IAL x IAL</b>   | 0.0965     |
|                        | <b>IAL x other</b> | 0.0962     |
| <b><i>In(3R)Mo</i></b> | <b>IAL x IAL</b>   | 0.1025     |
|                        | <b>IAL x other</b> | 0.1042     |
|                        | <b>Genome-wide</b> | 0.1181     |

405 Table 2. Pairwise correlation of gene expression. Mean  $r^2$  was calculated from all pairwise correlation for the set  
406 description. IAL x IAL is the set of all pairwise correlation coefficients of expression between IAL for that inversion.  
407 IAL x other is the set of correlation coefficients of expression between IAL and all other (non-IAL).  
408

|                        |                 | <b>chr2L</b> | <b>chr2R</b> | <b>chr3L</b> | <b>chr3R</b> | <b>chrX</b> |
|------------------------|-----------------|--------------|--------------|--------------|--------------|-------------|
| <b><i>In(2L)t</i></b>  | <b>All loci</b> | 370          | 1            | 0            | 1            | 1           |
|                        | <b>IAL</b>      | 11           | 0            | 0            | 0            | 0           |
| <b><i>In(3R)Mo</i></b> | <b>All loci</b> | 0            | 2            | 0            | 663          | 0           |
|                        | <b>IAL</b>      | 0            | 0            | 0            | 110          | 0           |

409

410 Table 3. Location of loci with SNPs in LD with inversions. Loci are identified as BDGP v5.49 and Affymetrix library  
411 v.35 annotated gene regions containing SNPs in significant LD with the inversion (see Methods).

412



| <b>Inversion</b>       | Total Genes | Total IAL | IAL in LD with Inversion | Genes in LD with Inversion | E[X] | p(E[X]>x)              |
|------------------------|-------------|-----------|--------------------------|----------------------------|------|------------------------|
| <b><i>In(2L)t</i></b>  | 11969       | 192       | 11                       | 372                        | 6    | 0.01683                |
| <b><i>In(3R)Mo</i></b> |             | 425       | 102                      | 744                        | 26   | $6.08 \times 10^{-35}$ |

413 Table 4. IAL in LD with inversion. Expected counts ( E[X] ) and p-values are calculated by hypergeometric  
414 distribution with uncorrected p-value cutoff of p=0.025 for the two-tailed test. Genes included in analyses are  
415 annotated in both BDGP v5.49 and Affymetrix library version 35.  
416

| <b>Inversion</b>       | Total Genes | DroID TFs with Sig SNPs | Total DroID TF targets | Total DroID TF targets also IAL | Targets of Sig SNP DroID TFs also IAL | E[X] | p(E[X]>x) |
|------------------------|-------------|-------------------------|------------------------|---------------------------------|---------------------------------------|------|-----------|
| <b><i>In(2L)t</i></b>  | 10623       | 3                       | 3802                   | 181                             | 53                                    | 65   | 0.96260   |
| <b><i>In(3R)Mo</i></b> |             | 8                       | 2373                   | 385                             | 99                                    | 86   | 0.04801   |

417 Table 5. IAL as targets of Transcription Factors with SNPs in LD with inversion. Expected counts E[X] and p-values  
418 calculated by hypergeometric distribution with uncorrected p-value cutoff of p=0.025 for the two-tailed test.  
419 Genes included in these analyses are annotated in BDGP v5.49, Affymetrix library v.35, and DroIDb v2015\_12.  
420

|              | <i>ln(2L)t</i> |       | Genome | <i>ln(3R)Mo</i> |                |
|--------------|----------------|-------|--------|-----------------|----------------|
|              | 95% conf. int. | Obs   | Obs    | Obs             | 95% conf. int. |
| <b>chr2L</b> | 0.882-1.366    | 1.338 | 2.612  | 1.417           | 0.834-1.305    |
| <b>chr2R</b> | 0.834-1.341    | 1.066 | 3.11   | 1.176           | 0.853-1.287    |
| <b>chr3L</b> | 0.806-1.352    | 0.979 | 2.812  | 1.129           | 0.829-1.278    |
| <b>chr3R</b> | 0.786-1.341    | 1.015 | 2.681  | 1.676           | 1.07-1.312     |
| <b>chrX</b>  | 0.724-1.399    | 1.152 | 2.814  | 0.944           | 0.734-1.295    |

421 Table 6. Gene location dispersion as described by the Coefficient of Variation (CV). Observed genome CV's  
422 calculated from loci in both Flybase ver.5.49 and Affymetrix Drosophila2 r35 annotation databases by chromosome  
423 arm. See Methods for details.

424 **Supplemental Tables**

425

| <b>Inversion</b>       | Total Genes | Total IAL | IAL Inside Inversion | Genes Inside Inversion | E[X] | $p(E[X]>x)$             |
|------------------------|-------------|-----------|----------------------|------------------------|------|-------------------------|
| <b><i>In(2L)t</i></b>  | 11969       | 192       | 41                   | 1279                   | 20   | $4.3045 \times 10^{-6}$ |
| <b><i>In(3R)Mo</i></b> |             | 425       | 112                  | 871                    | 31   | $7.6 \times 10^{-36}$   |

426 Supplemental Table 1. IAL inside inversion region. Expected counts E[X] and p-values are calculated by  
 427 hypergeometric distribution with uncorrected p-value cutoff of  $p=0.025$  for the two-tailed test. Genes included in  
 428 analyses are annotated in both BDGP v5.49 and Affymetrix library version 35.

429

| <b>Inversion</b>       | Total Genes | Total IAL | IAL as $F_{st}$ outliers | Total $F_{st}$ outliers | E[X] | $p(E[X]>x)$ |
|------------------------|-------------|-----------|--------------------------|-------------------------|------|-------------|
| <b><i>In(2L)t</i></b>  | 11969       | 192       | 35                       | 1992                    | 32   | 0.24089     |
| <b><i>In(3R)Mo</i></b> |             | 425       | 79                       |                         | 71   | 0.12336     |

430 Supplemental Table 2. IAL as  $F_{st}$  outliers in clinal populations. Populations from Reinhardt et al (2014). Number of  
 431 genes reflect the overlap between the unique Affymetrix Drosophila 2 annotated genes and FlyBase r5.49  
 432 annotations. Outliers are from the  $p=0.05$  tail of the empirical distribution of 1kb windows (see Reinhardt et al  
 433 (2014)).

434

435 **Supplemental Methods**

436 **Pairwise LD between SNPs:** was calculated with a custom Linux script as  $r^2$  and  $\chi^2$  calculated as  $\chi^2 = Nr^2$ , as  
437 described in Methods. We used the DGRP and excluded lines where either *In(2L)t* or *In(3R)Mo* was suspected to be  
438 segregating, We included SNPs that fell within the specified gene regions as annotated in FlyBase v5.49. SNPs with  
439 no base calls across all tested lines were excluded. Significance level was corrected for 843,051 tests (all unique, LD  
440 calculations for 1299 SNPs).  
441

442 **Literature Cited**

- 443 ANDERSON W. W., DOBZHANSKY T., KASTRITSIS C. D., 1967 Selection and inversion polymorphism in  
444 experimental populations of *Drosophila pseudoobscura* initiated with the chromosomal  
445 constitutions of natural populations. *Evolution* (N. Y). **21**: 664–671.
- 446 ANDERSON A. R., HOFFMANN A. A., MCKECHNIE S. W., UMINA P. A., WEEKS A. R., 2005 The latitudinal cline in  
447 the In(3R)Payne inversion polymorphism has shifted in the last 20 years in Australian *Drosophila*  
448 *melanogaster* populations. *Mol. Ecol.* **14**: 851–8.
- 449 ANDOLFATTO P., DEPAULIS F., NAVARRO A., 2001 Inversion polymorphisms and nucleotide variability in  
450 *Drosophila*. *Genet. Res. (Camb)*. **77**: 1–8.
- 451 ANDOLFATTO P., WALL J. D., KREITMAN M., 1999 Unusual Haplotype Structure at the Proximal Breakpoint  
452 of In(2L)t in a Natural Population of *Drosophila melanogaster*. *Genetics* **153**: 1297–1311.
- 453 AULARD S., DAVID J. R., LEMEUNIER F., 2002 Chromosomal inversion polymorphism in Afrotropical  
454 populations of *Drosophila melanogaster*. *Genet. Res. (Camb)*. **79**: 49–63.
- 455 AYROLES J. F., CARBONE M. A., STONE E. A., JORDAN K. W., LYMAN R. F., MAGWIRE M. M., ROLLMANN S. M.,  
456 DUNCAN L. H., LAWRENCE F., ANHOLT R. R. H., MACKAY T. F. C., 2009 Systems genetics of complex  
457 traits in *Drosophila melanogaster*. *Nat. Genet.* **41**: 299–307.
- 458 BERGLAND A. O., TOBLER R., GONZÁLEZ J., SCHMIDT P., PETROV D., 2016 Secondary contact and local  
459 adaptation contribute to genome-wide patterns of clinal variation in *Drosophila melanogaster*.  
460 *Mol. Ecol.* **25**: 1157–74.
- 461 CARVALHO M., SAMPAIO J. L., PALM W., BRANKATSCHK M., EATON S., SHEVCHENKO A., , 2012 Effects of diet and  
462 development on the *Drosophila* lipidome. *Mol. Syst. Biol.* **8**: 600.
- 463 CARVALHO M., SCHWUDKE D., SAMPAIO J. L., PALM W., RIEZMAN I., DEY G., GUPTA G. D., MAYOR S., RIEZMAN H.,  
464 SHEVCHENKO A., KURZCHALIA T. V., EATON S., 2010 Survival strategies of a sterol auxotroph.  
465 *Development* **137**.
- 466 CHAMBERS G. K., 1991 Gene expression, adaptation and evolution in higher organisms. Evidence from  
467 studies of *Drosophila* alcohol dehydrogenases. *Comp. Biochem. Physiol. Part B Comp. Biochem.* **99**:  
468 723–730.
- 469 COGNI R., KUCZYNSKI K., KOURY S., LAVINGTON E., BEHRMAN E. L., O'BRIEN K. R., SCHMIDT P. S., EANES W. F.,  
470 2017 On the Long-term Stability of Clines in Some Metabolic Genes in *Drosophila melanogaster*.  
471 *Sci. Rep.* **7**: 42766.
- 472 COHEN J., 1988 *Statistical Power Analysis for the Behavioral Sciences*.
- 473 CONTRINO S., SMITH R. N., BUTANO D., CARR A., HU F., LYNE R., RUTHERFORD K., KALDERIMIS A., SULLIVAN J.,  
474 CARBON S., KEPHART E. T., LLOYD P., STINSON E. O., WASHINGTON N. L., PERRY M. D., RUZANOV P., ZHA Z.,  
475 LEWIS S. E., STEIN L. D., MICKLEM G., 2012 modMine: flexible access to modENCODE data. *Nucleic*  
476 *Acids Res.* **40**: D1082-8.

- 477 COOKE J., SANG J. H., 1970 Utilization of sterols by larvae of *Drosophila melanogaster*. *J. Insect Physiol.*  
478 **16**: 801–812.
- 479 CORBETT-DETIG R. B., CARDENO C., LANGLEY C. H., 2012a Sequence-based detection and breakpoint  
480 assembly of polymorphic inversions. *Genetics* **192**: 131–7.
- 481 CORBETT-DETIG R. B., HARTL D. L., , 2012b Population Genomics of Inversion Polymorphisms in *Drosophila*  
482 *melanogaster* (HS Malik, Ed.). *PLoS Genet.* **8**: e1003056.
- 483 DOBZHANSKY T., 1947 Genetics of Natural Populations. Xiv. a Response of Certain Gene Arrangements in  
484 the Third Chromosome of *DROSOPHILA PSEUDOOBSCURA* to Natural Selection. *Genetics* **32**: 142–  
485 60.
- 486 DOBZHANSKY T., OTHERS, 1970 *Genetics of the evolutionary process*. Columbia University Press New York.
- 487 DOBZHANSKY T., STURTEVANT a. H., 1938 Inversions in the chromosomes of *Drosophila pseudoobscura*.  
488 *Genetics* **23**: 28–64.
- 489 FEUK L., 2010 Inversion variants in the human genome: role in disease and genome architecture.  
490 *Genome Med.* **2**: 11.
- 491 FOUET C., GRAY E., BESANSKY N. J., COSTANTINI C., REIG O., 2012 Adaptation to Aridity in the Malaria  
492 Mosquito *Anopheles gambiae*: Chromosomal Inversion Polymorphism and Body Size Influence  
493 Resistance to Desiccation (J Pinto, Ed.). *PLoS One* **7**: e34841.
- 494 FRASER H. B., 2013 Gene expression drives local adaptation in humans. *Genome Res.* **23**: 1089–96.
- 495 FRASER A., BURNELL D., MILLER D., 1966 Simulation of genetic systems X. Inversion polymorphism. *J.*  
496 *Theor. Biol.* **13**: 1–14.
- 497 FULLER Z. L., HAYNES G. D., RICHARDS S., SCHAEFFER S. W., 2016 Genomics of Natural Populations: How  
498 Differentially Expressed Genes Shape the Evolution of Chromosomal Inversions in *Drosophila*  
499 *pseudoobscura*. *Genetics* **204**.
- 500 HALDANE J. B. S., 1957 The conditions for coadaptation in polymorphism for inversions. *J. Genet.* **55**:  
501 218–225.
- 502 HOFFMANN A. A., SGRÒ C. M., WEEKS A. R., 2004 Chromosomal inversion polymorphisms and adaptation.  
503 *Trends Ecol. Evol.* **19**: 482–8.
- 504 HOFFMANN A. A., SHIRRIFFS J., SCOTT M., 2005 Relative importance of plastic vs genetic factors in adaptive  
505 differentiation: Geographical variation for stress resistance in *Drosophila melanogaster* from  
506 eastern Australia. *Funct. Ecol.* **19**: 222–227.
- 507 HOULE D., MÁRQUEZ E. J., 2015 Linkage Disequilibrium and Inversion-Typing of the *Drosophila*  
508 *melanogaster* Genome Reference Panel. *G3 (Bethesda)*. **5**: 1695–701.
- 509 HUANG W., CARBONE M. A., MAGWIRE M. M., PEIFFER J. A., LYMAN R. F., STONE E. A., ANHOLT R. R. H., MACKAY  
510 T. F. C., 2015 Genetic basis of transcriptome diversity in *Drosophila melanogaster*. *Proc. Natl.*

- 511 Acad. Sci. U. S. A. **112**: E6010-6019.
- 512 HUANG W., MASSOURAS A., INOUE Y., PEIFFER J., RÀMIA M., TARONE A. M., TURLAPATI L., ZICHNER T., ZHU D.,  
513 LYMAN R. F., MAGWIRE M. M., BLANKENBURG K., CARBONE M. A., CHANG K., ELLIS L. L., FERNANDEZ S., HAN  
514 Y., HIGHNAM G., HJELMEN C. E., JACK J. R., JAVAID M., JAYASEELAN J., KALRA D., LEE S., LEWIS L., MUNIDASA  
515 M., ONGERI F., PATEL S., PERALES L., PEREZ A., PU L., ROLLMANN S. M., RUTH R., SAADA N., WARNER C.,  
516 WILLIAMS A., WU Y.-Q., YAMAMOTO A., ZHANG Y., ZHU Y., ANHOLT R. R. H., KORBEL J. O., MITTELMAN D.,  
517 MUZNY D. M., GIBBS R. A., BARBADILLA A., JOHNSTON J. S., STONE E. A., RICHARDS S., DEPLANCKE B., MACKAY  
518 T. F. C., 2014 Natural variation in genome architecture among 205 *Drosophila melanogaster*  
519 Genetic Reference Panel lines. *Genome Res.* **24**: 1193–208.
- 520 HUANG X., WARREN J. T., BUCHANAN J., GILBERT L. I., SCOTT M. P., 2007 *Drosophila* Niemann-Pick type C-2  
521 genes control sterol homeostasis and steroid biosynthesis: a model of human neurodegenerative  
522 disease. *Development* **134**: 3733–42.
- 523 JONG G. DE, BOCHDANOVITS Z., 2003 Latitudinal clines in *Drosophila melanogaster*: Body size, allozyme  
524 frequencies, inversion frequencies, and the insulin-signalling pathway. *J. Genet.* **82**: 207–223.
- 525 KAPUN M., FABIAN D. K., GOUDET J., FLATT T., 2016 Genomic Evidence for Adaptive Inversion Clines in  
526 *Drosophila melanogaster*. *Mol. Biol. Evol.*: msw016-.
- 527 KAPUN M., SCHALKWYK H. VAN, MCALLISTER B., FLATT T., SCHLÖTTERER C., 2014 Inference of chromosomal  
528 inversion dynamics from Pool-Seq data in natural and laboratory populations of *Drosophila*  
529 *melanogaster*. *Mol. Ecol.* **23**: 1813–1827.
- 530 KENNINGTON W. J., PARTRIDGE L., HOFFMANN A. A., 2006 Patterns of diversity and linkage disequilibrium  
531 within the cosmopolitan inversion In(3R)Payne in *Drosophila melanogaster* are indicative of  
532 coadaptation. *Genetics* **172**: 1655–63.
- 533 KIDD J. M., GRAVES T., NEWMAN T. L., FULTON R., HAYDEN H. S., MALIG M., KALLICKI J., KAUL R., WILSON R. K.,  
534 EICHLER E. E., 2010 A Human Genome Structural Variation Sequencing Resource Reveals Insights  
535 into Mutational Mechanisms. *Cell* **143**: 837–847.
- 536 KIRKPATRICK M., BARTON N., 2006 Chromosome inversions, local adaptation and speciation. *Genetics* **173**:  
537 419–34.
- 538 KIRKPATRICK M., KERN A., 2012 Where's the money? Inversions, genes, and the hunt for genomic targets  
539 of selection. *Genetics* **190**: 1153–5.
- 540 KNIBB W. R., OAKESHOTT J. G., GIBSON J. B., 1981 Chromosome Inversion Polymorphism in *Drosophila*  
541 *melanogaster*. I. Latitudinal Clines and Associations between Inversions in Australian Populations.  
542 *Genetics* **98**: 833–847.
- 543 KOLACZKOWSKI B., KERN A. D., HOLLOWAY A. K., BEGUN D. J., 2011 Genomic differentiation between  
544 temperate and tropical Australian populations of *Drosophila melanogaster*. *Genetics* **187**: 245–60.
- 545 KOLESNIKOV N., HASTINGS E., KEAYS M., MELNICHIK O., TANG Y. A., WILLIAMS E., DYLAG M., KURBATOVA N.,  
546 BRANDIZI M., BURDETT T., MEGY K., PILICHEVA E., RUSTICI G., TIKHONOV A., PARKINSON H., PETRYSZAK R.,  
547 SARKANS U., BRAZMA A., 2015 ArrayExpress update--simplifying data submissions. *Nucleic Acids Res.*



- 548           **43:** D1113-6.
- 549   KRIMBAS C. B., POWELL J. R., 1992 *Drosophila Inversion Polymorphism*. CRC Press.
- 550   LAKICH D., KAZAZIAN H. H., ANTONARAKIS S. E., GITSCHIER J., 1993   Inversions disrupting the factor VIII gene  
551           are a common cause of severe haemophilia A. *Nat. Genet.* **5:** 236–241.
- 552   LANGLEY C. H., STEVENS K., CARDENO C., LEE Y. C. G., SCHRIDER D. R., POOL J. E., LANGLEY S. A., SUAREZ C.,  
553           CORBETT-DETIG R. B., KOLACZKOWSKI B., FANG S., NISTA P. M., HOLLOWAY A. K., KERN A. D., DEWEY C. N.,  
554           SONG Y. S., HAHN M. W., BEGUN D. J., 2012   Genomic variation in natural populations of *Drosophila*  
555           *melanogaster*. *Genetics* **192:** 533–98.
- 556   LEVENE H., DOBZHANSKY T., 1958   New evidence of heterosis in naturally occurring inversion  
557           heterozygotes in *Drosophila pseudoobscura*. *Heredity (Edinb.)*. **12:** 37–49.
- 558   LÓPEZ-MAURY L., MARGUERAT S., BÄHLER J., 2008   Tuning gene expression to changing environments: from  
559           rapid responses to evolutionary adaptation. *Nat. Rev. Genet.* **9:** 583–93.
- 560   LOWRY D. B., WILLIS J. H., 2010   A widespread chromosomal inversion polymorphism contributes to a  
561           major life-history transition, local adaptation, and reproductive isolation. *PLoS Biol.* **8:** e1000500.
- 562   MACKAY T. F. C., RICHARDS S., STONE E. A., BARBADILLA A., AYROLES J. F., ZHU D., CASILLAS S., HAN Y., MAGWIRE  
563           M. M., CRIDLAND J. M., RICHARDSON M. F., ANHOLT R. R. H., BARRÓN M., BESS C., BLANKENBURG K. P.,  
564           CARBONE M. A., CASTELLANO D., CHABOUB L., DUNCAN L., HARRIS Z., JAVAID M., JAYASEELAN J. C., JHANGIANI  
565           S. N., JORDAN K. W., LARA F., LAWRENCE F., LEE S. L., LIBRADO P., LINHEIRO R. S., LYMAN R. F., MACKAY A. J.,  
566           MUNIDASA M., MUZNY D. M., NAZARETH L., NEWSHAM I., PERALES L., PU L.-L., QU C., RÀMIA M., REID J. G.,  
567           ROLLMANN S. M., ROZAS J., SAADA N., TURLAPATI L., WORLEY K. C., WU Y.-Q., YAMAMOTO A., ZHU Y.,  
568           BERGMAN C. M., THORNTON K. R., MITTELMAN D., GIBBS R. A., 2012   The *Drosophila melanogaster*  
569           Genetic Reference Panel. *Nature* **482:** 173–8.
- 570   MASSOURAS A., WASZAK S. M., ALBARCA-AGUILERA M., HENS K., HOLCOMBE W., AYROLES J. F., DERMITZAKIS E. T.,  
571           STONE E. A., JENSEN J. D., MACKAY T. F. C., DEPLANCKE B., 2012   Genomic variation and its impact on  
572           gene expression in *Drosophila melanogaster*. *PLoS Genet.* **8:** e1003055.
- 573   MATZKIN L. M., MERRITT T. J. S., ZHU C.-T., EANES W. F., 2005   The structure and population genetics of the  
574           breakpoints associated with the cosmopolitan chromosomal inversion In(3R)Payne in *Drosophila*  
575           *melanogaster*. *Genetics* **170:** 1143–52.
- 576   NEI M., KOJIMA K. I., SCHAFFER H. E., 1967   Frequency changes of new inversions in populations under  
577           mutation-selection equilibria. *Genetics* **57:** 741–50.
- 578   NIWA R., NIWA Y. S., NIWA R., NIWA Y. S., 2011   The Fruit Fly *Drosophila melanogaster* as a Model System  
579           to Study Cholesterol Metabolism and Homeostasis. *Cholesterol* **2011:** 1–6.
- 580   PARKER D. J., VESALA L., RITCHIE M. G., LAIHO A., HOIKKALA A., KANKARE M., 2015   How consistent are the  
581           transcriptome changes associated with cold acclimation in two species of the *Drosophila virilis*  
582           group? *Heredity (Edinb.)*. **115:** 13–21.
- 583   PEPPER J. W., 2003   The evolution of evolvability in genetic linkage patterns. *Biosystems* **69:** 115–126.

- 584 POOL J. E., CORBETT-DETIG R. B., SUGINO R. P., STEVENS K. A., CARDENO C. M., CREPEAU M. W., DUCHEN P.,  
585 EMERSON J. J., SAELAO P., BEGUN D. J., LANGLEY C. H., 2012 Population Genomics of sub-saharan  
586 *Drosophila melanogaster*: African diversity and non-African admixture. *PLoS Genet.* **8**: e1003080.
- 587 R CORE TEAM, 2013 R: A Language and Environment for Statistical Computing.
- 588 REIMAND J., ARAK T., ADLER P., KOLBERG L., REISBERG S., PETERSON H., VILO J., 2016 g:Profiler-a web server for  
589 functional interpretation of gene lists (2016 update). *Nucleic Acids Res.:* gkw199-.
- 590 REINHARDT J. A., KOLACZKOWSKI B., JONES C. D., BEGUN D. J., KERN A. D., , 2014 Parallel geographic variation  
591 in *Drosophila melanogaster*. *Genetics* **197**: 361–73.
- 592 SCHRIDER D. R., HAHN M. W., BEGUN D. J., 2016 Parallel Evolution of Copy-Number Variation across  
593 Continents in *Drosophila melanogaster*. *Mol. Biol. Evol.* **33**: 1308–1316.
- 594 SEZGIN E., DUVERNELL D. D., MATZKIN L. M., DUAN Y., ZHU C.-T., VERRELLI B. C., EANES W. F., 2004 Single-locus  
595 latitudinal clines and their relationship to temperate adaptation in metabolic genes and derived  
596 alleles in *Drosophila melanogaster*. *Genetics* **168**: 923–31.
- 597 SHREVE S. M., YI S. X., LEE R. E., 2007 Increased dietary cholesterol enhances cold tolerance in *Drosophila*  
598 *melanogaster*. **28**: 33–37.
- 599 SOKAL R. R., ROHLF F. J., 1995 *Biometry*.
- 600 STEFANSSON H., HELGASON A., THORLEIFSSON G., STEINTHORSDDOTTIR V., MASSON G., BARNARD J., BAKER A.,  
601 JONASDOTTIR A., INGASON A., GUDNADOTTIR V. G., DESNICA N., HICKS A., GYLFASSON A., GUDBJARTSSON D. F.,  
602 JONSDOTTIR G. M., SAINZ J., AGNARSSON K., BIRGISDOTTIR B., GHOSH S., OLAFSDOTTIR A., CAZIER J.-B.,  
603 KRISTJANSSON K., FRIGGE M. L., THORGEIRSSON T. E., GULCHER J. R., KONG A., STEFANSSON K., 2005 A  
604 common inversion under selection in Europeans. *Nat. Genet.* **37**: 129–37.
- 605 STOREY J. D., TIBSHIRANI R., 2003 Statistical significance for genomewide studies. *Proc. Natl. Acad. Sci. U.*  
606 *S. A.* **100**: 9440–5.
- 607 STURTEVANT A. H., MATHER K., 1938 The Interrelations of Inversions, Heterosis and Recombination. *Am.*  
608 *Nat.* **72**: 447–452.
- 609 STURTEVART A. H., 1921 A CASE OF REARRANGEMENT OF GENES IN DROSOPHILA. *Proc. Natl. Acad. Sci. 7:*  
610 235–237.
- 611 TELONIS-SCOTT M., SGRÒ C. M., HOFFMANN A. A., GRIFFIN P. C., 2016 Cross-Study Comparison Reveals  
612 Common Genomic, Network, and Functional Signatures of Desiccation Resistance in *Drosophila*  
613 *melanogaster*. *Mol. Biol. Evol.* **33**: 1053–1067.
- 614 TLAND J. VAN, PUTTEN W. F. VAN, VILLARROEL H., KAMPING A., DELDEN W. Van, 2000 Latitudinal Variation for  
615 Two Enzyme Loci and an Inversion Polymorphism in *Drosophila melanogaster* from Central and  
616 South America. *Evolution (N. Y.)* **54**: 201–209.
- 617 TOBARI Y. N., KOJIMA K. I., 1967 Selective modes associated with inversion karyotypes in *Drosophila*  
618 *ananassae*. I. Frequency-dependant selection. *Genetics* **57**: 179–88.

- 619 UMINA P. A., WEEKS A. R., KEARNEY M. R., MCKECHNIE S. W., HOFFMANN A. A., 2005 A rapid shift in a classic  
620 clinal pattern in *Drosophila* reflecting climate change. *Science* **308**: 691–3.
- 621 VONESCH S. C., LAMPARTER D., MACKAY T. F. C., BERGMANN S., HAFEN E., MARKOW T., JENSEN L., LEE S., WEE C.,  
622 HOFFMANN A., 2016 Genome-Wide Analysis Reveals Novel Regulators of Growth in *Drosophila*  
623 *melanogaster* (GS Barsh, Ed.). *PLOS Genet.* **12**: e1005616.
- 624 WEEKS A. R., MCKECHNIE S. W., HOFFMANN A. A., 2002 Dissecting adaptive clinal variation: markers,  
625 inversions and size/stress associations in *Drosophila melanogaster* from a central field population.  
626 *Ecol. Lett.* **5**: 756–763.
- 627 WESLEY C. S., EANES W. F., 1994 Isolation and analysis of the breakpoint sequences of chromosome  
628 inversion In(3L)Payne in *Drosophila melanogaster*. *Proc. Natl. Acad. Sci.* **91**: 3132–3136.
- 629
